# 1 **Cross-sectional white matter microstructure differences in aging and** 2 **trait mindfulness**

3

4 **Wouter Boekel<sup>1</sup> and Shulan Hsieh<sup>1\*</sup>**

5

6

7 <sup>1</sup> Control-Aging-Sleep-Emotion (CASE) Laboratory, Department of Psychology,

8 College of Social Sciences, National Cheng Kung university, Tainan, Taiwan

9

10 \*Corresponding Author

11 Email: [psyhsl@mail.ncku.edu.tw](mailto:psyhsl@mail.ncku.edu.tw)

12

13

14

15

16

17 Disclosure statement

18 Conflict of Interest: The authors have no actual or potential conflicts of interest.

19

## 20 **Abstract**

21       The process of aging can be characterized by a decline in cognitive performance,  
 22       which may be accompanied by deterioration in specific structural properties of the  
 23       brain. In this study we sought to investigate to what extent mindfulness changes over  
 24       the aging process, and which alterations in brain structure can be associated to aging  
 25       and concomitant changes in mindfulness. We collected Mindful Attention Awareness  
 26       Scale questionnaire data to assess trait mindfulness and acquired diffusion-weighted  
 27       imaging data fitted to the diffusion tensor model in a group of 97 middle-aged to  
 28       elderly participants. Our results showed that trait mindfulness increased with age. In  
 29       terms of white matter structure our results suggested that there was a general increase  
 30       of omnidirectional diffusion, which favored radial over axial diffusivity, leading to a  
 31       decrease in fractional anisotropy (FA) in older participants. We further showed that  
 32       trait mindfulness mediated the FA-age effect in a localized area consisting of the  
 33       internal and external capsule, as well as the corona radiata. The implication of this  
 34       mediation analysis is that trait mindfulness may deter age-associated neurocognitive  
 35       decline, perhaps by preventing age-associated microlesions specifically in  
 36       cortico-subcortical white matter tracts. This study can be considered a pioneer of  
 37       using DTI studies to investigate the relationship between age and trait mindfulness.

## 38 **Introduction**

39       Healthy aging has become an important research topic, due to increasingly  
 40       effective healthcare keeping our elders alive longer. Life expectancy has been  
 41       increasing since the industrial revolution and is approaching an average of 70 years  
 42       worldwide [1]. Birthrates have gone down in many countries, especially in those with  
 43       low child mortality rates [1]. In the forthcoming years, wealthy countries will see  
 44       larger cohorts of elderly people as compared to younger individuals. This shift in the  
 45       population's age distribution increases the importance of neuropsychological research  
 46       aimed at finding efficient ways of maintaining mental health in aging.

47       Cognitive decline is generally accepted as a “normal” part of aging. Yet, not all  
 48       cognitive processes will decline with age. So far, research has shown that some  
 49       cognitive processes (e.g., vocabulary, world knowledge) are less impaired while other  
 50       cognitive processes such as speed of processing, working memory, and reasoning  
 51       show large decrements with increasing age [2]. In particular, many studies have  
 52       provided evidence showing that older adults have deteriorated cognitive control  
 53       functions, such as less working memory capacity [3,4,5], a deficit in inhibitory  
 54       processing[6, 7], and a lack of cognitive flexibility [8,9]. One possible fundamental  
 55       deficit that triggers these cognitive problems with increasing age is a general decrease

in the *control* over task-relevant mental processes. That is, it becomes increasingly more difficult for older adults to apply new rules, to coordinate multiple rules, and to maintain relevant information in the context of interfering information.

More practically, age-related declines in cognitive functions have been shown to be associated with severe deficits in the elders' everyday life activities. For example, some researchers have found performance on cognitive assessments to be associated with instrumental activities of daily living (IADL), such as paying bills, shopping for groceries [10,11]. There are findings showing that updating working memory and task-switching have the strongest relationships with IADL (three domains: home management, financial management, and health and safety). There is also evidence cognitive function influences self-care capacity. For example, learning proper inhaler-use technique has been found to be associated with higher scores on the Executive Interview among older adults [12]. In addition, older adults who exhibited poor performance on tests measuring cognitive flexibility have been found to have increased difficulty in everyday problem solving.

Cognitive function and flexibility have been found to be intimately linked with mindfulness [13,14]. It is important to investigate whether mindfulness plays a role in the aging process. Mindfulness can be divided into two broad categories: state and trait mindfulness [15]. State mindfulness refers to how mindful an individual is in the

present moment, hence reflecting a more transient, moment-to-moment experience of mindfulness [16]; whereas trait mindfulness refers to an individual's natural or innate mindfulness tendency, which has been perceived as a stable, permanent characteristic [17]. Research reporting the relationship between mindfulness and aging has focused more on the manipulation of state mindfulness rather than trait mindfulness. For example, accumulating evidence has suggested that mindfulness-based interventions<sup>1</sup> (MBI; [18,19,20]) may provide a way to deter the detrimental effects of aging, by promoting body, cognitive, and emotional health [21,22,13,23,24,25]. Mindfulness-based interventions may work because they provide a more holistic attentional training, in the sense that they allow training of general attentional mechanisms, the improvement of which benefits many cognitive tasks. However, neurocognitive research on mindfulness is scarce, and the effect of mindfulness on brain structure has not been elucidated yet. Studies report neural benefits of mindfulness such as increases of overall brain *fractional anisotropy* (FA) [26] and altered concentrations of important brain metabolites [27] (see Fox et al., 2014 and 2016 [28,29] for reviews on the neurocognitive underpinnings of mindfulness meditation). These findings are interesting, yet there is not enough evidence to allow us to draw general conclusions.

---

<sup>1</sup> Please note, in this study, we defined mindfulness-based intervention as a broad term, including a variety of mindfulness-related practices, such as various forms of attention-based and active-based meditations.

93        Although research into state mindfulness has important clinical applications, trait  
94        mindfulness may provide more insight to infer how individual differences in  
95        mindfulness may interact with aging processes [17]. Based on the current literature, it  
96        still remains unclear to what extent individual differences in trait mindfulness may  
97        interact with the aging process, and whether these interactions are reflected in  
98        individual differences in brain structure and plasticity. Prior research discovering  
99        differences in the cognitive trajectories of healthy older adults [30] suggests that  
100       cognitive decline may not be a necessary consequence of aging, but may result from a  
101       range of risk factors that become more prevalent with increasing age. Understanding  
102       the mechanisms that contribute to different trajectories of cognitive decline in  
103       clinically intact older adults is a significant target for the prevention or reduction in  
104       progression of cognitive decline and dementia in old age.

105       In this study, we investigate whether trait mindfulness shows an association with  
106       age and whether brain structural differences (in terms of white matter tract) can  
107       inform us about age and mindfulness. In order to answer these questions, we recruited  
108       a group of healthy participants from middle-age to elderly and acquired their  
109       diffusion-weighted imaging (DWI) data that were further fitted to a diffusion tensor  
110       model (i.e., diffusion tensor imaging; DTI) to detect water diffusion directionality, which  
111       in turn shows the microstructural architecture of tissue. A questionnaire survey containing

the Mindful Attention Awareness Scale (MAAS; [31]) was used to measure trait mindfulness.

## Methods

All procedures performed in studies involving human participants were in accordance with the ethical standards of the institutional research ethical committee at National Cheng Kung University, and with the 1964 Helsinki declaration and its later amendments or comparable ethical standards.

## Participants

A total of 97 participants who were part of a larger lifespan data set collected at National Cheng Kung University were recruited for the present study. All participants were right-handed (Edinburgh Handedness Inventory; [32]), in good general health, without major neurological and psychological disorders, and had normal or corrected-to-normal vision. Demographic information about these 97 participants is presented in Table 1. All participants signed the informed consent form before participating in the experiments. All subjects were paid 1,500 NTD (around \$50 USD) after completion of the experiment.

129 **Table 1. Demographics information of participants**

|                  | Mean  | Range | SE   |
|------------------|-------|-------|------|
| <b>Age</b>       | 57.26 | 40-77 | 0.95 |
| <b>Education</b> | 13.72 | 4-18  | 0.30 |
| <b>MoCA</b>      | 26.80 | 22-30 | 0.19 |
| <b>BDI-II</b>    | 5.12  | 0-13  | 0.42 |
| <b>PSQI</b>      | 6.16  | 1-14  | 0.35 |
| <b>MAAS</b>      | 61.48 | 41-90 | 1.15 |

130 *Note.* SE: standard error; MoCA: Montreal Cognitive Assessment; BDI-II: Beck  
131 Depression Inventory II; PSQI: Pittsburgh Sleep Quality Index; MAAS: Mindful  
132 Attention Awareness Scale.

## 133 Questionnaires

134 A set of neuropsychological questionnaires was implemented: (1) The Montreal  
135 Cognitive Assessment (MoCA) to screen participants for probable dementia [33]. (2)  
136 The Beck Depression Inventory (BDI-II) to screen depression [34]. (3) A Chinese  
137 version of the Pittsburgh Sleep Quality Index-PSQI to measure the quality and  
138 patterns of sleep [35]. (4) The 15-item Mindful Attention Awareness Scale (MAAS)  
139 to measure trait mindfulness [36]. It took between 5 and 10 minutes to complete all  
140 questionnaires.



## 141 **Imaging Protocols**

142       Magnetic resonance images (MRI) were acquired using a GE MR750 3T scanner  
 143       (GE Healthcare, Waukesha, WI, USA) in the Mind Research Imaging (MRI) center of  
 144       National Cheng Kung University. High resolution structural images were acquired  
 145       using fast-SPGR, consisting 166 axial slices (TR/TE/flip angle, 7.6 ms/3.3 ms/12°;  
 146       field of view (FOV), 22.4 × 22.4 cm<sup>2</sup>; matrices, 224 × 224; slice thickness, 1 mm),  
 147       and the entire process lasted for 218 s. Diffusion weighted imaging (DWI) were  
 148       obtained with a spin-echo-echo planar sequence (TR/TE = 5500 ms/minimum, 50  
 149       directions with b= 1000 s/mm<sup>2</sup>, 100 x 100 matrices, slice thickness = 2.5 mm, voxel  
 150       size = 2.5 x 2.5 x 2.5 mm, number of slices = 50, FOV = 25 cm, NEX = 3). 6  
 151       non-diffusion-weighted (b = 0 s/mm<sup>2</sup>) volumes were acquired, 3 of which were  
 152       acquired with reversed phase encoding so as to allow correction for susceptibility  
 153       induced distortions.

## 154 **DTI processing**

155       All DWI data processing and analyses were carried out using FMRIB's Software  
 156       Library (FSL, version 5.0.9; [www.fmrib.ox.ac.uk/fsl](http://www.fmrib.ox.ac.uk/fsl); [37]). Diffusion weighted  
 157       images were first converted from DICOM to NIFTI format using the MRICron's  
 158       dcm2nii tool (<https://www.nitrc.org/projects/mricron/>). TOPUP [37,38] and EDDY

[39] were used to clean the DWI images of artifacts caused by susceptibility induced distortions, eddy currents, and head motion. A single image without diffusion weighting ( $b_0$ ;  $b$  value = 0 s/mm<sup>2</sup>) was extracted from the concatenated data, and non-brain tissue was removed using FMRIB's brain extraction tool [40] to create a brain mask that was used in subsequent analyses. DTIFIT (diffusion tensor imaging fitting model; [41]Behrens et al., 2003) was applied to fit a tensor model at each voxel of the data to derive *fractional anisotropy* (FA), mean diffusivity (MD), axial diffusivity (AD), and radial diffusivity (RD) measures for further analyses.

In order to perform tract-based investigations into DTI measures we performed tract-based spatial statistics (TBSS; [42]) in FSL, which involves voxel-wise statistical analyses of the DWI data. FA images were slightly eroded and end slices were zeroed in order to remove likely outliers from the diffusion tensor fitting. The images were then nonlinearly aligned to each other and the most representative image was then identified. This target image was subsequently affine transformed to 1mm MNI space. FA images were transformed to 1mm MNI space using a combination of the nonlinear and affine registration. A skeletonization procedure was then performed on the group-mean FA image, the result of which was thresholded at  $FA > 0.2$  to identify areas most likely to belong to white matter tracts of nontrivial size.

## Statistical analyses

Linear regressions were performed in R (version 3.0.2; R Foundation for Statistical Computing, <http://www.R-project.org>) to test for (1) a linear association between participant's age and their self-reported MAAS mindfulness score, controlling for gender and MoCA, BDI, and PSQI scores as regressors of no interest; and (2) a linear association between DTI measures (i.e., FA, MD, RD, AD) and age, controlling for gender, and MoCA, BDI, PSQI, and MAAS scores (1 regression per measure). In addition, we performed a mediation analysis predicting age based on FA using MAAS scores as a mediator. For the Bayesian version of these tests we used the BayesFactor (<http://bayesfactorpcl.r-forge.r-project.org/>) and BayesMed (<https://CRAN.R-project.org/package=BayesMed>;[43]) toolboxes. For the voxel-wise univariate regressions we used FSL's randomize function on a model mimicking our whole-brain average regressions, testing for a linear association between FA and MAAS scores, controlling for age, gender, and MoCA, BDI, and PSQI scores.

For both the behavioral and DTI results we report classical frequentist p-values, as well as Bayes factors, which provide a more conservative evaluation of the correlations. For ease of reading, we provide both  $BF_{10}$  (Bayes factor for the presence of a correlation) and  $BF_{01}$  (Bayes factor for the absence of a correlation). These are inversely related (i.e.,  $BF_{10} = 1/BF_{01}$  and  $BF_{01} = 1/BF_{10}$ ). Bayes factors may be

interpreted as proportional evidence for the presence or absence of an effect. For instance  $BF_{10}$  of 5 may be interpreted as the data being 5 times more likely to occur under the alternative hypothesis than under the null-hypothesis. In addition, we can interpret the Bayes factor categorically based on a grouping proposed by Jeffreys [44]. Table 2 shows this evidence categorization for the  $BF_{01}$ , edited by and taken from Wetzels and Wagenmakers ([45]; Table 1, p. 1060). For a detailed explanation of the Bayesian statistics and the Bayes factor, see [46].

**Table 2. Suggested categories for interpreting Bayes factors based on Jeffreys**

[44]

| Bayes factor $BF_{01}$ |     |       | Interpretation                 |
|------------------------|-----|-------|--------------------------------|
|                        | $>$ | 100   | Extreme evidence for $H_0$     |
| 30                     | -   | 100   | Very Strong evidence for $H_0$ |
| 10                     | -   | 30    | Strong evidence for $H_0$      |
| 3                      | -   | 10    | Moderate evidence for $H_0$    |
| 1                      | -   | 3     | Anecdotal evidence for $H_0$   |
|                        | 1   |       | No evidence                    |
| 1/3                    | -   | 1     | Anecdotal evidence for $H_1$   |
| 1/10                   | -   | 1/3   | Moderate evidence for $H_1$    |
| 1/30                   | -   | 1/10  | Strong evidence for $H_1$      |
| 1/100                  | -   | 1/30  | Very Strong evidence for $H_1$ |
|                        | $<$ | 1/100 | Extreme evidence for $H_1$     |

## Results

### Age and MAAS

We performed a linear regression predicting age based on MAAS scores. Gender, MoCA, BDI, and PSQI scores were added to the GLM as regressors of no interest. A classical linear regression showed a significant association of MAAS scores ( $t = 3.267$ ,  $p = 0.00154$ ; Fig 1) with age, suggesting that older individuals have higher mindfulness scores than younger individuals (note our sample's age range: 40 - 77). In addition, a Bayesian linear regression showed strong evidence of a positive association between age and MAAS ( $BF_{10} = 206.9$ ).

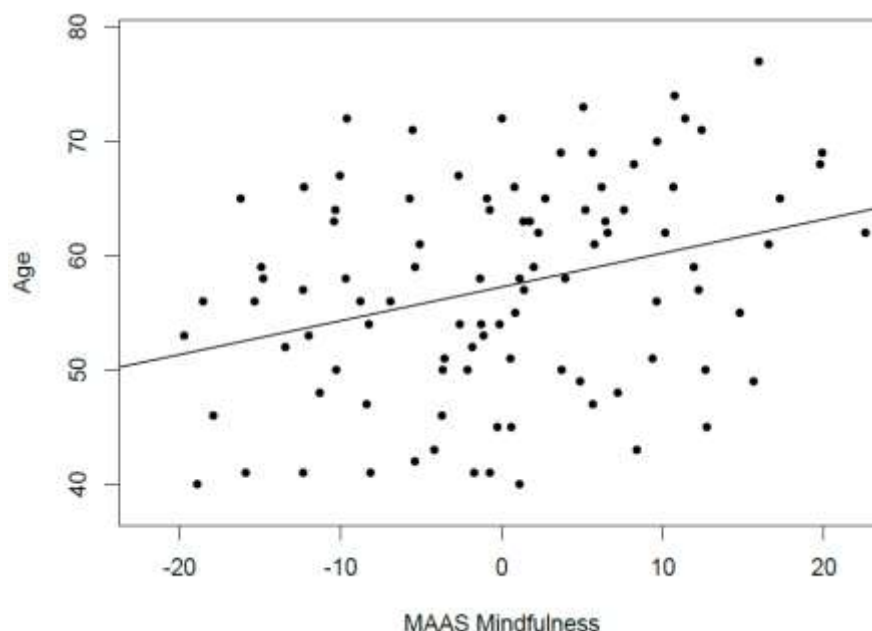

**Fig. 1. Positive correlation between age and mindfulness assessed by the Mindful Attention Awareness Scale (MAAS). Scatterplot with regression line.**

## 217 **DTI and Age**

218 We performed a linear regression predicting whole brain average FA based on  
 219 age while regressing out variance attributed to gender, and scores on MAAS, MoCA,  
 220 BDI, and PSQI. We observed a negative correlation between FA and age ( $t = -5.497$ ,  
 221  $p = 0.000000357$ ,  $BF_{10} = 21379$ , Table 3 & Fig 2), suggesting that in older individuals  
 222 the diffusion tensor is less fractionally anisotropic than in relatively younger  
 223 individuals. Increases in FA may arise from both a relative decrease in RD, as well as  
 224 from a relative increase in AD. In addition, MD provides information about the  
 225 overall omnidirectional diffusion. To elucidate the precise nature of the tensor  
 226 transformation leading to our observed FA-age relation, we also extracted  
 227 whole-brain skeleton-averaged RD, AD, and MD, and regressed these against  
 228 subject's age (again controlling for gender, MAAS, MoCA, BDI, and PSQI). Results  
 229 can be seen in Table 3 We observed a positive relation between RD and age ( $t =$   
 230  $5.033$ ,  $p = 0.00000246$ ,  $BF_{10} = 9540$ ; Fig 3), and non-significant positive relation  
 231 between AD and age ( $t = 1.895$ ,  $p = 0.0613$ ,  $BF_{10} = 1.546$ ). For the purpose of  
 232 understanding the nature of the tensor transformation underlying our observed FA-age  
 233 effect, it is sufficient to attend to the direction of the correlation, which is positive,  
 234 indicating an increase in diffusion along the principle diffusion direction (i.e., AD).  
 235 For the negative FA-age correlation to emerge, the RD has to sufficiently increase as

well, which indeed seems to be the case. In addition, we observe a positive correlation between MD and age ( $t = 4.286$ ,  $p = 0.0000455$ ,  $BF_{10} = 754.7$ ; Fig 4), in accordance with the increase in both AD and RD. As such, we may expect that with age there is a general increase of omnidirectional diffusion, which favors radial over axial diffusivity, leading to a decrease in FA. This cross-sectional effect serves as a hypothesis for longitudinal follow-up phases of this study.

**Table 3. Correlation between FA/MD/RD/AD and Age**

|           | <b>t</b> | <b>p</b>    | <b>BF<sub>10</sub></b> | <b>BF<sub>01</sub></b> |
|-----------|----------|-------------|------------------------|------------------------|
| <b>FA</b> | -5.497   | 0.000000357 | 21379                  | 0.00004677             |
| <b>MD</b> | 4.286    | 0.0000455   | 754.7                  | 0.001325               |
| <b>RD</b> | 5.033    | 0.00000246  | 9540                   | 0.0001047              |
| <b>AD</b> | 1.895    | 0.0613      | 1.54641                | 0.6467                 |

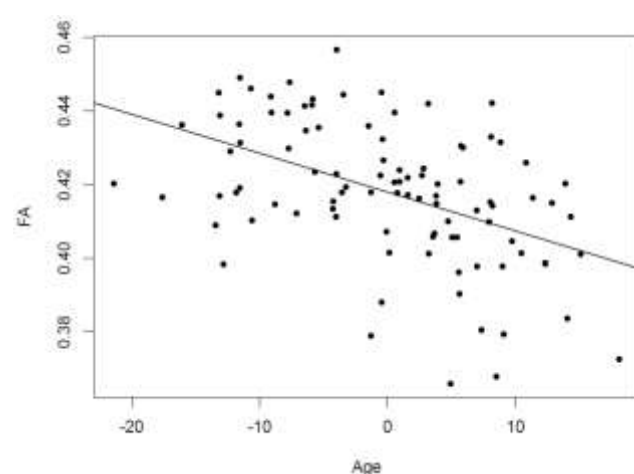

**Fig. 2. Negative correlation between FA and age. Scatterplot with regression line.**

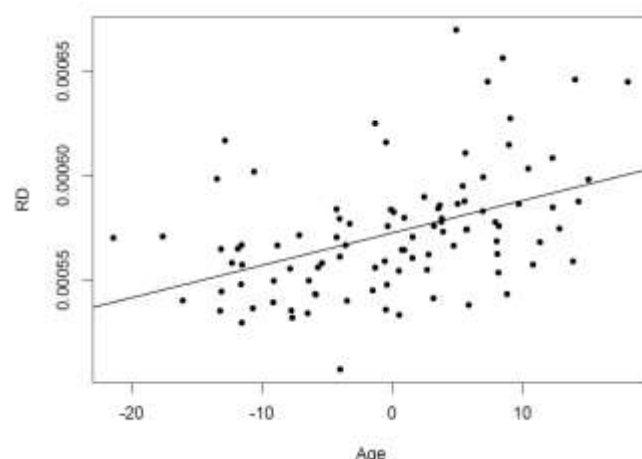

**Fig. 3. Positive correlation between RD and age. Scatterplot with regression line.**

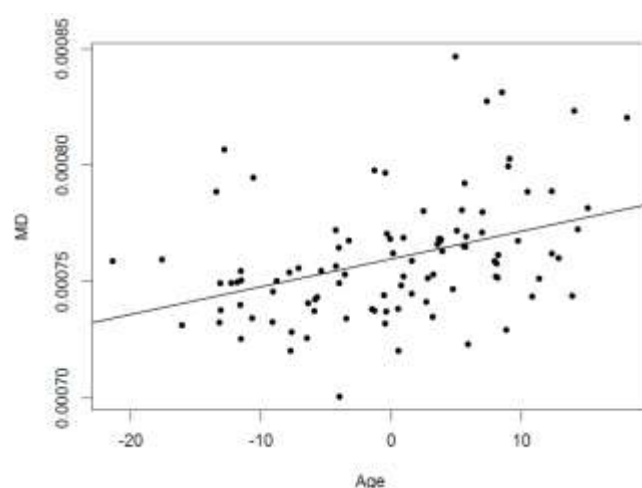

**Fig. 4. Positive correlation between MD and age. Scatterplot with regression line.**

## DTI and MAAS

In addition to cross-sectional age differences, we were interested in cross-sectional differences in DTI measures relating to MAAS scores. We performed a linear regression between DTI measures and MAAS, while regressing out age, gender, and scores on MoCA, BDI, and PSQI. We found no significant relation between MAAS and FA ( $t = 1.095$ ,  $p = 0.2764$ ,  $BF_{10} = 0.2977$ ). Inverting the Bayes



factor here provides substantial evidence in favor of the null-hypothesis (the absence of a relation),  $BF_{01} = 3.576$ . We subsequently investigated the remaining DTI measures MD, RD, and AD, which were also found not to be associated with MAAS scores (all  $BF_{01} > 3$ , Table 4).

**Table 4. Correlation between FA/MD/RD/AD and MAAS**

|           | <i>t</i> | <i>p</i> | $BF_{10}$ | $BF_{01}$ |
|-----------|----------|----------|-----------|-----------|
| <b>FA</b> | 1.095    | 0.2764   | 0.2977    | 3.576     |
| <b>MD</b> | 0.074    | 0.9415   | 0.3126    | 3.199     |
| <b>RD</b> | -0.311   | 0.7563   | 0.3281    | 3.048     |
| <b>AD</b> | 1.026    | 0.3075   | 0.2530    | 3.952     |

We performed an additional mass-univariate regression analysis within the whole-brain white matter skeleton in order to pinpoint spatially localized relations between MAAS and white matter microstructure (i.e., tensor-derived measures). We found a positive relation between FA and MAAS in the left hemisphere, specifically in the internal and external capsule, extending widely from the anterior to the posterior parts of both of these white-matter tracts, and extending dorsally into the corona radiata ( $t = 5.482$ ,  $p < 0.05$  corrected for multiple comparisons; Fig 5). As mentioned previously, differences in FA can be driven by differences in RD as well as AD, so we extracted the mask-average AD and RD from the voxels showing a

positive relation between FA and MAAS. We found a positive relation between AD and MAAS scores ( $t = 3.479$ ,  $p = 0.000777$ ,  $BF_{10} = 8.90$ ), and a negative relation between RD and MAAS scores ( $t = -3.687$ ,  $p = 0.000387$ ,  $BF_{10} = 3.02$ ). As such, it seems that in individuals with a higher self-report score on the MAAS mindfulness scale, the diffusion tensor displays a relatively decreased RD, and a relatively increased AD, as compared to low-mindfulness individuals, leading to an overall increase of FA in mindful individuals in the internal and external capsule extending dorsally into the corona radiata.

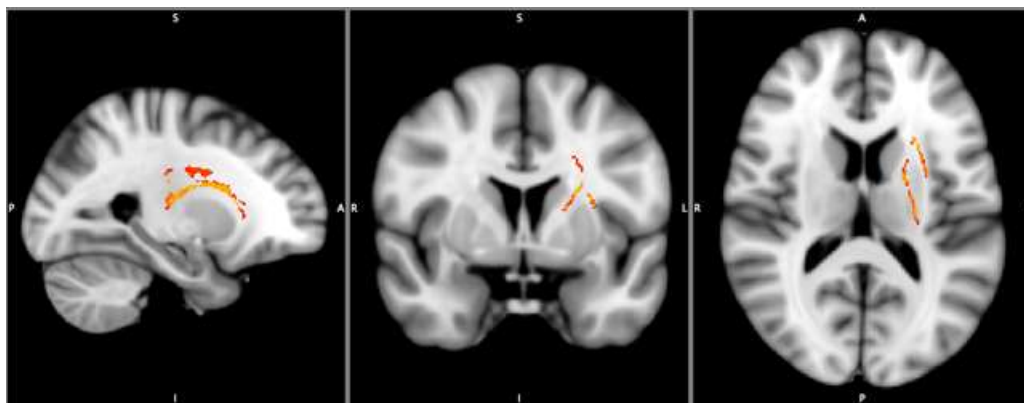

**Fig. 5. FA-MAAS correlation at x, y, z coordinates: 115, 128, 86.**

## **Mediation analysis: Age, MAAS, and FA**

In light of this finding we were additionally interested in whether MAAS may serve as a mediator between age and FA within the spatially localized area which showed significant MAAS-FA associations. A mediation analysis showed that MAAS was indeed mediating the association between FA and age within this area ( $BF_{10} =$

45.39). We interpret this finding to suggest that as individuals age, FA in this region is preserved, especially for individuals who self-report to be more mindful.

## Discussion

In this study we sought to investigate the relation between characteristics of white matter microstructure, age, and MAAS. To this end we acquired diffusion weighted imaging data in combination with a set of questionnaires (MAAS, MoCA, BDI, PSQI) from a group of elderly participants. We found that age was positively associated with MAAS suggesting that older individuals tend to have higher mindfulness scores. Raes et al. [47] also found a similar age-MAAS effect, as did Mahoney et al. [48], although they used a younger age range and nonlinear aging effects were observed.

In terms of DTI metrics and age our results suggested that in older participants there is a general increase of omnidirectional diffusion, which favors radial over axial diffusivity, leading to a decrease in FA. This is consistent with previous findings which also showed a general decline in FA with age [49,50,51,52].

Our voxelwise investigation into DTI metrics and MAAS found a localized positive association between FA and MAAS in the left hemisphere corona radiata and the internal and external capsule. This finding is in line with some studies using a

MBI approach (a measure of state mindfulness), where FA was shown to increase in the corona radiata after intervention. For example, Tang et al [53,54] found that by training participants using a form of mindfulness meditation, integrative body-mind training (IBMT), FA increased in the corona radiata. Corona radiata is an important white matter tract connecting the anterior cingulate cortex (ACC) to other brain structures, so its communication efficiency plays a role in modulating brain activity in the ACC [55]. In line with the finding that FA increased in the corona radiata due to mindfulness meditation, Grant and colleagues [56] observed that cortical thickness in the dorsal ACC was greater for participants with experience in meditation than those without. Therefore, these findings provide convergent evidence for the important role of radiata corona in relation to state mindfulness.

In addition to the corona radiata tract and ACC, some researchers suggest that other brain regions are related to state mindfulness, including insula, temporo-parietal junction, dorsal prefrontal cortex (dPFC), ventro-medial PFC, hippocampus, amygdala, medial PFC, posterior cingulate cortex, insula, and temporo-parietal junction (see [57], Table 2). Based on this neural evidence for an association between brain structures and different facets of mindfulness meditation (e.g., intention, attention, attitude, body awareness, reappraisal, and changes in perspectives on self), Grecucci and colleagues [55] suggest that there are top-down and bottom-up neural

circuits involved in the processes of mindful emotion regulation. These circuits include top-down control regions such as the PFC and the ACC and bottom-up emotional regions such as the insula (I) and the amygdala (A). Furthermore, these two neural circuits (PFC-ACC & A-I) may interact with each other via connective neural structures such as the corona radiata. Based on the neuroimaging evidence derived from these MBI studies, the current finding that the FA in the corona radiata tract is positively correlated with MAAS appears to be reconciled with Grecucci et al.'s [55] postulation that the increased FA in the corona radiata tract may facilitate the connection between the two neural circuits (PFC-ACC & A-I), resulting in FA being highly associated with MAAS. Furthermore, our additional mediation analysis showing that MAAS mediated the relationship between age and FA in the radiata corona tract, suggests that as individuals age, FA in the radiata corona is preserved, especially for those individuals with higher trait mindfulness(as reflected by MAAS scores).

It is worth noting that the current finding of a FA-MAAS association is characterized by a thinning and elongation of the diffusion tensor, this is both due to AD increasing with respect to MAAS, as well as RD decreasing. As such, it seems the white-matter in this area is more streamlined for individuals who self-report to be more mindful. The tensor model used here cannot directly inform us about the

biological causes of these effects [58], although we could speculate that an overall loss of FA due to white matter lesions occurs with age [51], and that mindfulness in life may prevent some of these lesions. This speculation can be supported by the current mediation analysis showing that MAAS was indeed mediating the association between FA and age within the internal and external capsule, as well as the corona radiata. Future studies could test this hypothesis by employing mindfulness-based interventions longitudinally, since the cross-sectional nature of this study precludes a direct observation of age-related change.

Although the current findings using DTI and trait mindfulness approaches appear to be reconciled with those reported by the studies employing the MBI approach [53,54,55,56,57], research into structure-function associations in trait mindfulness is still considered scarce, and the literature is not yet unified regarding the involved brain systems in state mindfulness. For example, Luders et al. [26] found larger FA in different brain structures to be associated with mindfulness training, including a fiber tract constituting the temporal component of the superior longitudinal fasciculus (tSLF) and a fiber tract linked to the hippocampus, i.e., the uncinated fasciculus (UNC). On the other hand, Tang et al. [53] and Hölzel et al. [57] additionally observed larger FA in an entire fiber tract connecting frontal and temporo-parietal regions, the SLF, and in a fiber bundle linked to the hippocampus, the cingulate

cortex hippocampus (CgH), to be associated with active mediation practices.

Furthermore, in addition to the aforementioned DTI-based studies, Fox et al. [28] reviewed and used activation likelihood estimation to perform a meta-analysis on the brain structures underpinning mindfulness, in which they observed larger voxel based morphometry in intra- and inter-hemispheric communication (e.g., SLF; corpus callosum) to be associated with meditation. Given these various findings regarding which fiber tracts are related to mindfulness experience, further studies are needed to clarify the involvement of specific brain structures.

## Conclusion

The current results show that with increasing age, an individual's trait mindfulness tends to increase, but in contrast, whole-brain overall FA decreases due to increasing omnidirectional diffusion. On the other hand, FA in a localized area consisting of the internal and external capsule, as well as the corona radiata, showed an increase with trait mindfulness. Interestingly, we subsequently found that trait mindfulness mediates the FA-age effect in this localized area. Therefore, we speculate that trait mindfulness may deter age-associated neurocognitive decline, perhaps by preventing age-associated microlesions specifically in cortico-subcortical white

matter tracts. This study can be considered a pioneer of using DTI studies to investigate the relationship between age and trait mindfulness.

## Acknowledgments

We thank Frini Karayanidis, Birte Forstmann, Alexander Conley, and Wouter Boekel for their great help in setting up this study and Hsing-Hao Lee and Yu-Chi Lin for their help in collecting data. We thank the Mind Research and Imaging Center (MRIC), supported by MOST, at NCKU for consultation and instrument availability.

## References

1. Roser M. Life Expectancy. 2017 in: OurWorldInData.org [Internet]. Available from: <https://ourworldindata.org/life-expectancy/>
2. Park DC, Bischof GN. The aging mind: neuroplasticity in response to cognitive training. *Dialogues Clin Neurosci*. 2013;15(1):109.
3. Grady CL, Craik FI. Changes in memory processing with age. *Curr Opin Neurobiol*. 2000;10(2):224-231.
4. Salthouse TA. The nature of the influence of speed on adult age differences in cognition. *Dev Psychol*. 1994;30(2):240.
5. West RL. An application of prefrontal cortex function theory to cognitive aging. *Psychol Bull*. 1996;120(2):272.



- 395 6. Hasher L, Zacks RT. Working memory, comprehension, and aging: A review and  
396 a new view. Psychol Learn Motiv. 22: Elsevier; 1988. p. 193-225.
- 397 7. Kramer AF, Humphrey DG, Larish JF, Logan GD. Aging and inhibition: beyond  
398 a unitary view of inhibitory processing in attention. Psychol Aging. 1994;9(4):491.
- 399 8. Kramer AF, Hahn S, Gopher D. Task coordination and aging: Explorations of  
400 executive control processes in the task switching paradigm. Acta Psychol (Amst).  
401 1999;101(2-3):339-378.
- 402 9. Mayr U. Age differences in the selection of mental sets: the role of inhibition,  
403 stimulus ambiguity, and response-set overlap. Psychol Aging. 2001;16(1):96.
- 404 10. Cahn-Weiner DA, Boyle PA, Malloy PF. Tests of executive function predict  
405 instrumental activities of daily living in community-dwelling older individuals. Appl  
406 Neuropsychol. 2002;9(3):187-191.
- 407 11. Grigsby J, Kaye K, Baxter J, Shetterly SM, Hamman RF. Executive cognitive  
408 abilities and functional status among community-dwelling older persons in the San  
409 Luis Valley Health and Aging Study. J Am Geriatr Soc. 1998;46(5):590-596.
- 410 12. Allen SC, Jain M, Ragab S, Malik N. Acquisition and short-term retention of  
411 inhaler techniques require intact executive function in elderly subjects. Age Ageing.  
412 2003;32(3):299-302.
- 413 13. Moore AW, Gruber T, Deroose J, Malinowski P. Regular, brief mindfulness

- 414 meditation practice improves electrophysiological markers of attentional control.
- 415 Front Hum Neurosci. 2012;6:18.
- 416 14. Baer RA. Mindfulness training as a clinical intervention: A conceptual and
- 417 empirical review. Clin Psychol (New York). 2003;10(2):125-143.
- 418 15. Bilevicius E, Smith SD, Kornelsen J. Resting-State Network Functional
- 419 Connectivity Patterns Associated with the Mindful Attention Awareness Scale. Brain
- 420 Connect. 2018;8(1):40-48.
- 421 16. Tanay G, Bernstein A. State Mindfulness Scale (SMS): development and initial
- 422 validation. Psychol Assess. 2013;25(4):1286.
- 423 17. Brown KW, Ryan RM. The benefits of being present: mindfulness and its role in
- 424 psychological well-being. J Pers Soc Psychol. 2003;84(4):822.
- 425 18. Cullen M. Mindfulness-based interventions: An emerging phenomenon.
- 426 Mindfulness. 2011;2(3):186-193.
- 427 19. Eberth J, Sedlmeier P. The effects of mindfulness meditation: a meta-analysis.
- 428 Mindfulness. 2012;3(3):174-189.
- 429 20. Prakash RS, De Leon AA, Patterson B, Schirda BL, Janssen AL. Mindfulness
- 430 and the aging brain: a proposed paradigm shift. Front Aging Neurosci. 2014;6:120.
- 431 21. Berk L, van Boxtel M, van Os J. Can mindfulness-based interventions influence
- 432 cognitive functioning in older adults? A review and considerations for future research.

- 433 Aging Ment Health. 2017;21(11):1113-1120.
- 434 22. Malinowski P, Moore AW, Mead BR, Gruber T. Mindful aging: the effects of
- 435 regular brief mindfulness practice on electrophysiological markers of cognitive and
- 436 affective processing in older adults. Mindfulness. 2017;8(1):78-94.
- 437 23. Sperduti M, Makowski D, Blondé P, Piolino P. Meditation and successful aging:
- 438 can meditative practices counteract age-related cognitive decline? Geriatr Psychol
- 439 Neuropsychiatr Vieil. 2017;15(2):205-213.
- 440 24. Zeidan F, Johnson SK, Diamond BJ, David Z, Goolkasian P. Mindfulness
- 441 meditation improves cognition: Evidence of brief mental training. Conscious Cogn.
- 442 2010;19(2):597-605.
- 443 25. Luders E, Cherbuin N. Searching for the philosopher's stone: promising links
- 444 between meditation and brain preservation. Ann N Y Acad Sci. 2016;1373(1):38-44.
- 445 26. Luders E, Clark K, Narr KL, Toga AW. Enhanced brain connectivity in long-term
- 446 meditation practitioners. Neuroimage. 2011;57(4):1308-1316.
- 447 27. Fayed N, del Hoyo YL, Andres E, Serrano-Blanco A, Bellón J, Aguilar K, et al.
- 448 Brain changes in long-term zen meditators using proton magnetic resonance
- 449 spectroscopy and diffusion tensor imaging: a controlled study. PLoS ONE.
- 450 2013;8(3):e58476.
- 451 28. Fox KC, Nijeboer S, Dixon ML, Floman JL, Ellamil M, Rumak SP, et al. Is

452 meditation associated with altered brain structure? A systematic review and  
 453 meta-analysis of morphometric neuroimaging in meditation practitioners. *Neurosci*  
 454 *Biobehav Rev.* 2014;43:48-73.

455 29. Fox KC, Dixon ML, Nijeboer S, Girn M, Floman JL, Lifshitz M, et al.  
 456 Functional neuroanatomy of meditation: A review and meta-analysis of 78 functional  
 457 neuroimaging investigations. *Neurosci Biobehav Rev.* 2016;65:208-228.

458 30. Yaffe K, Fiocco AJ, Lindquist K, Vittinghoff E, Simonsick EM, Newman AB, et  
 459 al. Predictors of maintaining cognitive function in older adults The Health ABC Study.  
 460 *Neurology.* 2009;72(23):2029-2035.

461 31. MacKillop J, Anderson EJ. Further psychometric validation of the mindful  
 462 attention awareness scale (MAAS). *J Psychopathol Behav Assess.*  
 463 2007;29(4):289-293.

464 32. Oldfield RC. The assessment and analysis of handedness: the Edinburgh  
 465 inventory. *Neuropsychologia.* 1971;9(1):97-113.

466 33. Nasreddine ZS, Phillips NA, Bédirian V, Charbonneau S, Whitehead V, Collin I,  
 467 et al. The Montreal Cognitive Assessment, MoCA: a brief screening tool for mild  
 468 cognitive impairment. *J Am Geriatr Soc.* 2005;53(4):695-699.

469 34. Beck AT, Steer RA, Brown GK. Beck depression inventory-II. San Antonio.  
 470 1996;78(2):490-498.

- 471 35. Buysse DJ, Reynolds CF, Monk TH, Berman SR, Kupfer DJ. The Pittsburgh  
472 Sleep Quality Index: a new instrument for psychiatric practice and research.  
473 Psychiatry Res. 1989;28(2):193-213.
- 474 36. Black DS, Sussman S, Johnson CA, Milam J. Psychometric assessment of the  
475 mindful attention awareness scale (MAAS) among Chinese adolescents. Assessment.  
476 2012;19(1):42-52.
- 477 37. Smith SM, Jenkinson M, Woolrich MW, Beckmann CF, Behrens TE,  
478 Johansen-Berg H, et al. Advances in functional and structural MR image analysis and  
479 implementation as FSL. Neuroimage. 2004;23:S208-S219.
- 480 38. Andersson JL, Skare S, Ashburner J. How to correct susceptibility distortions in  
481 spin-echo echo-planar images: application to diffusion tensor imaging. Neuroimage.  
482 2003;20(2):870-888.
- 483 39. Andersson JL, Sotiropoulos SN. An integrated approach to correction for  
484 off-resonance effects and subject movement in diffusion MR imaging. Neuroimage.  
485 2016;125:1063-1078.
- 486 40. Smith SM. Fast robust automated brain extraction. Hum Brain Mapp.  
487 2002;17(3):143-155.
- 488 41. Behrens TE, Woolrich MW, Jenkinson M, Johansen-Berg H, Nunes RG, Clare S,  
489 et al. Characterization and propagation of uncertainty in diffusion-weighted MR

490 imaging. *Magn Reson Med*. 2003;50(5):1077-1088.

491 42. Smith SM, Jenkinson M, Johansen-Berg H, Rueckert D, Nichols TE, Mackay CE,  
492 et al. Tract-based spatial statistics: voxelwise analysis of multi-subject diffusion data.  
493 *Neuroimage*. 2006;31(4):1487-1505.

494 43. Nuijten MB, Wetzels R, Matzke D, Dolan CV, Wagenmakers E-J. A default  
495 Bayesian hypothesis test for mediation. *Behav Res Methods*. 2015;47(1):85-97.

496 44. Jeffreys H. *Theory of probability*, (Oxford: Oxford University Press). 1961.

497 45. Wetzels R, Wagenmakers E-J. A default Bayesian hypothesis test for correlations  
498 and partial correlations. *Psychon Bull Rev*. 2012;19(6):1057-1064.

499 46. Ly A, Verhagen J, Wagenmakers E-J. An evaluation of alternative methods for  
500 testing hypotheses, from the perspective of Harold Jeffreys. *J Math Psychol*.  
501 2016;72:43-55.

502 47. Raes AK, Bruyneel L, Loeys T, Moerkerke B, De Raedt R. Mindful attention and  
503 awareness mediate the association between age and negative affect. *J Gerontol B*  
504 *Psychol Sci Soc Sci*. 2013;70(2):179-188.

505 48. Mahoney CT, Segal DL, Coolidge FL. Anxiety sensitivity, experiential avoidance,  
506 and mindfulness among younger and older adults: Age differences in risk factors for  
507 anxiety symptoms. *Int J Aging Hum Dev*. 2015;81(4):217-240.

508 49. Salat D, Tuch D, Greve D, Van Der Kouwe A, Hevelone N, Zaleta A, et al.

- 509 Age-related alterations in white matter microstructure measured by diffusion tensor  
510 imaging. *Neurobiol Aging*. 2005;26(8):1215-1227.
- 511 50. Sullivan EV, Rohlfing T, Pfefferbaum A. Quantitative fiber tracking of lateral  
512 and interhemispheric white matter systems in normal aging: relations to timed  
513 performance. *Neurobiol Aging*. 2010;31(3):464-481.
- 514 51. Vernooij MW, de Groot M, van der Lugt A, Ikram MA, Krestin GP, Hofman A,  
515 et al. White matter atrophy and lesion formation explain the loss of structural integrity  
516 of white matter in aging. *Neuroimage*. 2008;43(3):470-477.
- 517 52. Jolly TA, Cooper PS, Badwi WA, Azizah S, Phillips NA, Rennie JL, et al.  
518 Microstructural white matter changes mediate age-related cognitive decline on the  
519 Montreal Cognitive Assessment (MoCA). *Psychophysiology*. 2016;53(2):258-267.
- 520 53. Tang Y-Y, Lu Q, Geng X, Stein EA, Yang Y, Posner MI. Short-term meditation  
521 induces white matter changes in the anterior cingulate. *Proc Natl Acad Sci U S A*.  
522 2010;107(35):15649-15652.
- 523 54. Tang Y-Y, Lu Q, Fan M, Yang Y, Posner MI. Mechanisms of white matter  
524 changes induced by meditation. *Proc Natl Acad Sci U S A*.  
525 2012;109(26):10570-10574.
- 526 55. Grecucci A, Pappaianni E, Siugzdaite R, Theuninck A, Job R. Mindful emotion  
527 regulation: exploring the neurocognitive mechanisms behind mindfulness. *Biomed*

528 Res Int. 2015;2015.

529 56. Grant JA, Courtemanche J, Duerden EG, Duncan GH, Rainville P. Cortical  
530 thickness and pain sensitivity in zen meditators. Emotion. 2010;10(1):43.

531 57. Hölzel BK, Carmody J, Vangel M, Congleton C, Yerramsetti SM, Gard T, et al.  
532 Mindfulness practice leads to increases in regional brain gray matter density.  
533 Psychiatry Res. 2011;191(1):36-43.

534 58. Jones DK, Knösche TR, Turner R. White matter integrity, fiber count, and other  
535 fallacies: the do's and don'ts of diffusion MRI. Neuroimage. 2013;73:239-254.

536

537

538

539



540
